# Supplementary material for: Cumulative risk of revision after primary total hip arthroplasty in registries: Systematic review and meta-analysis of selected hip stems and cups
Source: bioRxiv or medRxiv preprint supplement (doi:10.1101/2024.04.03.24305257), 2024-04-03

Appendix 2: Flowchart for the selection of total hip arthroplasty registries

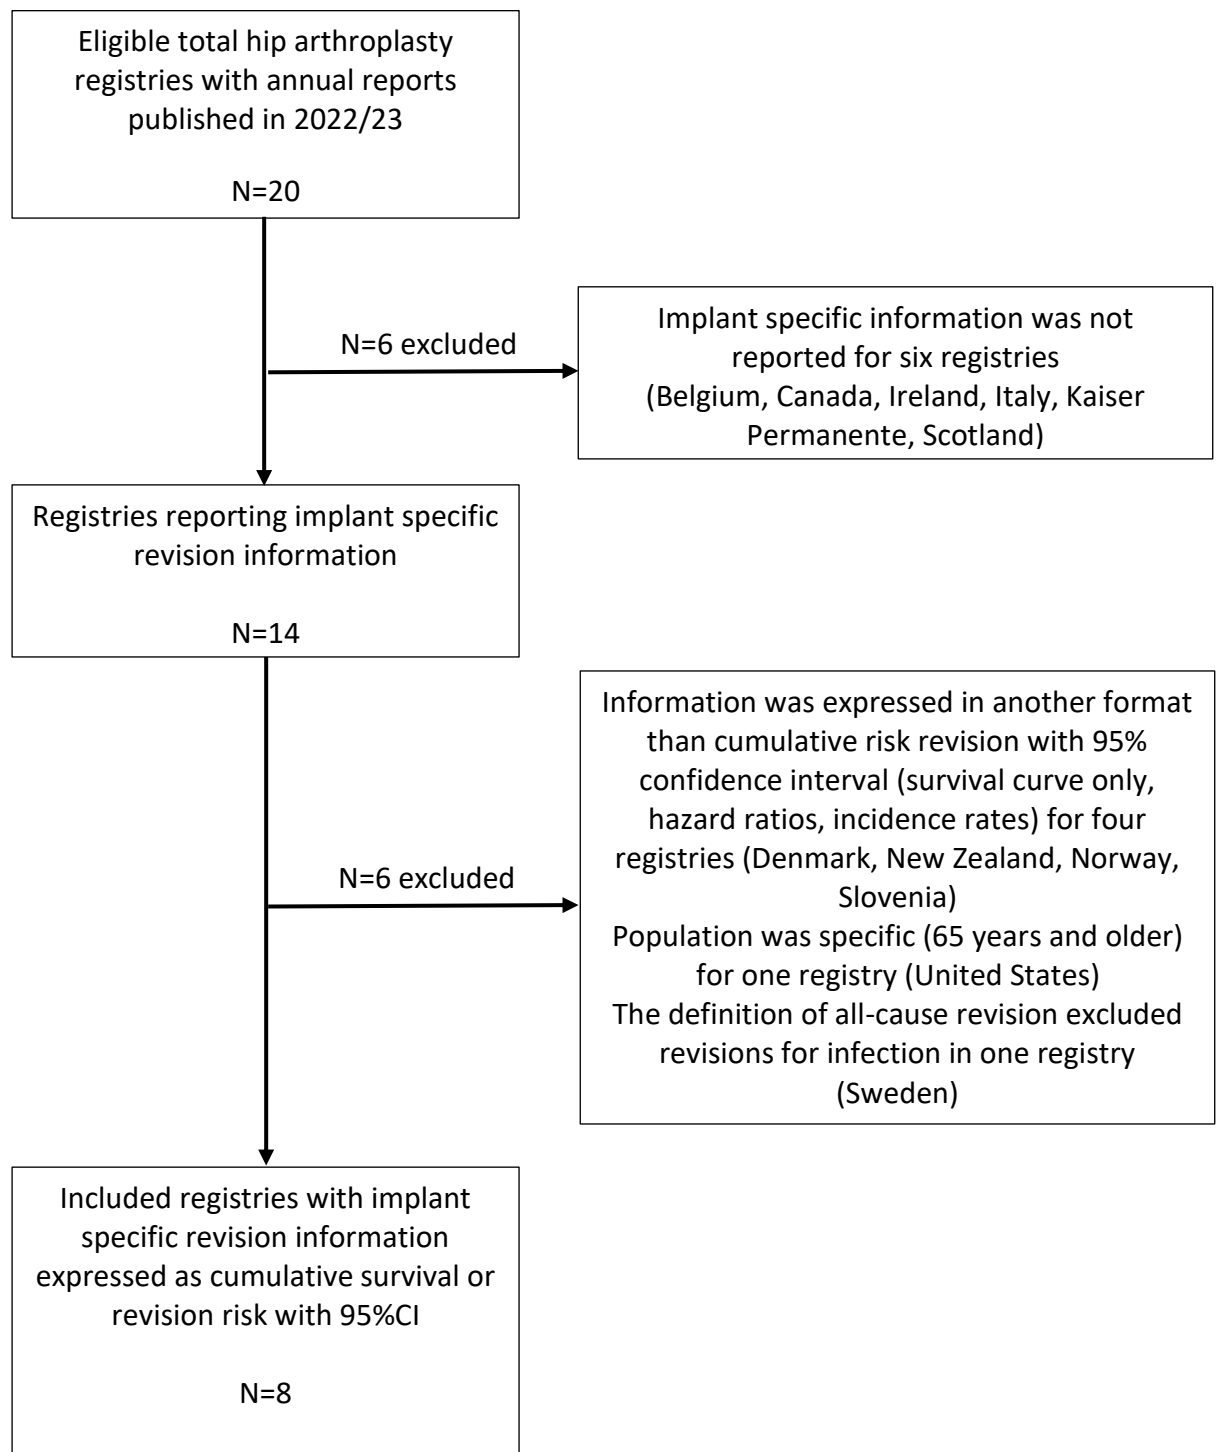

Supplement: Supplementary file [file media-2.pdf]
