# Supplementary material for: Cumulative risk of revision after primary total hip arthroplasty in registries: Systematic review and meta-analysis of selected hip stems and cups
Source: bioRxiv or medRxiv preprint supplement (doi:10.1101/2024.04.03.24305257), 2024-04-03

Appendix 5: CRRs for stems by registry and associated cup. Black squares represent the pooled CRRs independently of the associated cups and coloured symbols represent the associated cups.

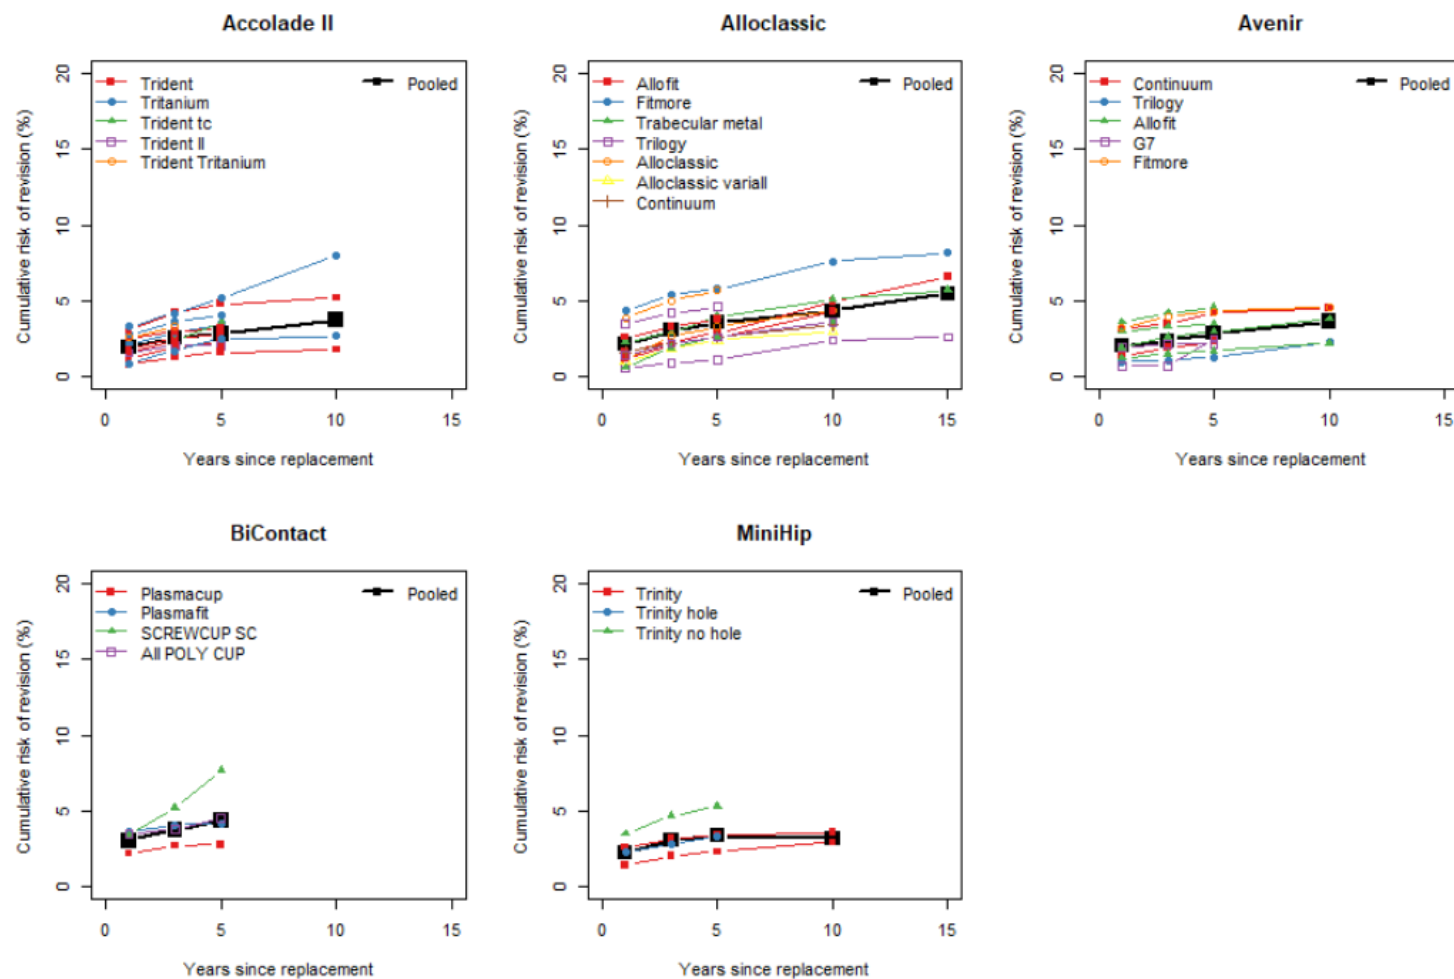

Supplement: Supplementary file [file media-5.pdf]
